# Supplementary material
Source: PubMed Central journal article supplement (PMC7304954)
Supplement: mmc1.pdf [file mmc1.pdf]

# THE LANCET

## Respiratory Medicine

### Supplementary appendix 1

This translation in Italian was submitted by the authors and we reproduce it as supplied. It has not been peer reviewed. *The Lancet's* editorial processes have only been applied to the original in English, which should serve as reference for this manuscript.

Questa traduzione in italiano è stata proposta dagli autori ed è riportata senza modifiche. Il testo tradotto in italiano non è stato sottoposto al processo di revisione paritaria. Il processo editoriale del *Lancet* è stato esclusivamente adottato per l'originale in inglese, che dovrebbe servire da riferimento per questo articolo.

Supplement to: Coppo A, Bellani G, Winterton D, et al. Feasibility and physiological effects of prone positioning in non-intubated patients with acute respiratory failure due to COVID-19 (PRON-COVID): a prospective cohort study. *Lancet Respir Med* 2020; published online June 19. [http://dx.doi.org/10.1016/S2213-2600\(20\)30268-X](http://dx.doi.org/10.1016/S2213-2600(20)30268-X).

## Fattibilità ed effetti fisiologici della posizione prona in pazienti non intubati con insufficienza respiratoria acuta da COVID-19 (PRON-COVID): studio di coorte prospettico

### Sommario

**Background:** la pandemia di COVID-19 rappresenta una sfida per i sistemi sanitari, che si trovano a gestire un numero enorme di pazienti con necessità di cure intensive per insufficienza respiratoria spesso necessitante intubazione. E' noto che, nei pazienti intubati, la pronazione riduce la mortalità nella ARDS moderata-severa. Lo scopo di questo lavoro è studiare la fattibilità e l'effetto sugli scambi gassosi della pronazione nei pazienti svegli non intubati con polmonite COVID-19 relata.

**Metodi:** In questo studio di coorte, di fattibilità, prospettico, sono stati arruolati nell'Ospedale di Monza San Gerardo, pazienti di età compresa tra i 18 e i 75 anni con diagnosi confermata di polmonite da COVID-19 in supplementazione di ossigeno o CPAP non invasiva. Abbiamo raccolto i dati basali di parametri demografici, antropometrici, gas arteriosi e ventilatori. Dopo la raccolta dei dati basale i pazienti venivano aiutati ad assumere la posizione prona, che è stata mantenuta per una durata minima di 3h. I dati clinici sono stati nuovamente raccolti 10 minuti dopo la pronazione e 1 h dopo il ritorno alla posizione supina. Il principale outcome dello studio era la variazione dell'ossigenazione (pressione parziale di ossigeno [ $\text{PaO}_2$ ]/frazione inspirata di ossigeno [ $\text{FiO}_2$ ]) tra il basale e la risupinazione, come indice di reclutamento polmonare. Questo studio è registrato su Clinical Trials.gov, NCT04365959, ed ora è completo.

**Risultati:** Tra il 20 Marzo e il 9 Aprile 2020 abbiamo arruolato 56 pazienti di cui 44 (79%) erano uomini, l'età media era 57.4 anni (SD 7.4) e il BMI era 27.5 kg/mq (3.7). La pronazione è risultata fattibile (cioè mantenuta per almeno 3 h) in 47 pazienti (83.9% [95% CI 71.7-92.4]). L'ossigenazione migliora sostanzialmente dalla posizione supina alla prona ( $\text{PaO}_2/\text{FiO}_2$  ratio 180.5 mmHg [SD 76.6] in posizione supina vs 285.5 mmHg [112.9] in posizione prona;  $p < 0.0001$ ). Dopo la risupinazione il miglioramento dell'ossigenazione si è mantenuto in 23 pazienti (50.0% [95% CI 34.9-65.1]; responders); questo miglioramento era in media non significativo comparato con quello a paziente supino prima della pronazione ( $\text{PaO}_2/\text{FiO}_2$  192.9 mmHg [SD 100.9] un h dopo la risupinazione;  $p = 0.29$ ). I pazienti che mantenevano l'incremento di ossigenazione avevano aumentati livelli di markers infiammatori (proteina C reattiva: 12.7 mg/L [SD 6.9] nei responders vs 8.4 [6.2] nei non-responders; le piastrine:  $241.1 \times 10^3/\mu\text{L}$  [101.9] vs  $319.8 \times 10^3/\mu\text{L}$  [120.6]) e un tempo più breve tra l'ammissione in ospedale e la pronazione (2.7 giorni [SD 2.1] nei responders vs 4.6 giorni [3.7] nei non-responders) rispetto a quelli che non mantengono il miglioramento dell'ossigenazione. 13 (28%) dei 46 pazienti sono stati poi intubati, sette (30%) dei 23 responders e sei (26%) dei 23 pazienti non-responders ( $p = 0.74$ ). Cinque pazienti sono morti durante il follow-up a causa di concomitanti patologie non correlate alla procedura in studio.

**Discussione:** La posizione prona è fattibile ed efficace nel migliorare rapidamente l'ossigenazione del sangue nei pazienti svegli con polmonite COVID-19 relata con necessità di supplementazione di ossigeno. L'effetto permaneva dopo la risupinazione nella metà dei pazienti. Successivi studi dovranno accertare il potenziale beneficio di questa tecnica nel migliorare definitivamente l'outcome sia respiratorio che globale.

**Funding:** Università di Milano-Bicocca
