# Supplementary material
Source: PubMed Central journal article supplement (PMC7304954)
Supplement: mmc2.pdf [file mmc2.pdf]

# THE LANCET

## Respiratory Medicine

### Supplementary appendix 2

This appendix formed part of the original submission and has been peer reviewed. We post it as supplied by the authors.

Supplement to: Coppo A, Bellani G, Winterton D, et al. Feasibility and physiological effects of prone positioning in non-intubated patients with acute respiratory failure due to COVID-19 (PRON-COVID): a prospective cohort study. *Lancet Respir Med* 2020; published online June 19. [http://dx.doi.org/10.1016/S2213-2600\(20\)30268-X](http://dx.doi.org/10.1016/S2213-2600(20)30268-X).

**Supplementary material for: “Feasibility and physiological effects of prone positioning in non-intubated patients with acute respiratory failure due to CoViD-19 (PRON-COVID) : a prospective cohort study”**

Anna Coppo<sup>1</sup>, MD, Giacomo Bellani<sup>1,2</sup>, MD, Dario Winterton<sup>1,2</sup>, MD, Michela Di Pierro<sup>1,2</sup>, MD, Alessandro Soria<sup>3</sup>, MD, Paola Faverio<sup>2,4</sup>, MD, Matteo Cairo<sup>1</sup>, MD, Silvia Mori<sup>2</sup>, PhD, Grazia Messinesi<sup>4</sup>, MD Ernesto Contro<sup>1</sup>, MD Paolo Bonfanti<sup>2,3</sup>, MD, Annalisa Benini<sup>1</sup>, MD, Maria Grazia Valsecchi<sup>2</sup>, PhD Laura Antolini<sup>2</sup>, PhD, Giuseppe Foti<sup>1,2</sup>, MD.

<sup>1</sup>Department of Emergency Medicine, San Gerardo Hospital, Monza, Italy

<sup>2</sup>Department of Medicine and Surgery, University of Milan-Bicocca, Monza, Italy

<sup>3</sup> Clinic of Infectious Diseases, San Gerardo Hospital, Monza, Italy

<sup>4</sup>Respiratory Unit, San Gerardo Hospital, Monza, Italy

**Table of contents**

|           |         |
|-----------|---------|
| Video 1   | Page 2  |
| Table E1  | Page 2  |
| Table E2  | Page 2  |
| Table E3  | Page 3  |
| Table E4  | Page 5  |
| Table E5  | Page 6  |
| Table E6  | Page 7  |
| Table E7  | Page 9  |
| Table E8  | Page 10 |
| Table E9  | Page 13 |
| Table E10 | Page 16 |
| Table E11 | Page 18 |

## VIDEO LEGEND

**Video 1** – Tutorial on prone positioning with helmet continuous positive airway pressure device – Video performed with a volunteer. Codec: H.265/HVEC

## TABLES

|                                           |               |
|-------------------------------------------|---------------|
| Age (y)                                   | 67.2 ± 10.9   |
| C-reactive protein (mg/dL)                | 11.7±9.4      |
| PaO <sub>2</sub> /FiO <sub>2</sub> (mmHg) | 205.8 ± 106.2 |

|                                         |             |
|-----------------------------------------|-------------|
| FiO <sub>2</sub>                        | 49.6±25.7   |
| PEEP (cmH <sub>2</sub> O)               | 8.3±2.6     |
| Arterial Blood Gas                      |             |
| pH                                      | 7.49±0.1    |
| PaO <sub>2</sub> (mmHg)                 | 80.4±50.5   |
| PaCO <sub>2</sub> (mmHg)                | 31.1±4.7    |
| SaO <sub>2</sub> (%)                    | 93.8±4.0    |
| White blood cells (10 <sup>3</sup> /μL) | 7.5±3.1     |
| Platelets (10 <sup>3</sup> /μL)         | 230.2±92.0  |
| Haemoglobin (g/dL)                      | 13.9±1.8    |
| INR                                     | 1.2±0.3     |
| aPTTr                                   | 1.1±0.1     |
| Bilirubin (mg/dL)                       | 0.6±0.4     |
| C-reactive protein (mg/dL)              | 10.8±9.2    |
| Procalcitonin                           | 0.4±0.5     |
| Na <sup>+</sup> (mmol/L)                | 137.0±4.7   |
| K <sup>+</sup> (mmol/L)                 | 4.0±0.6     |
| Cl <sup>-</sup> (mmol/L)                | 100.6±4.2   |
| Creatinine(mg/dL)                       | 1.0±0.2     |
| Lactic dehydrogenase (U/L)              | 423.9±201.2 |
| D-dimer (ng/dL)                         | 512.3±603.7 |
| AST/GOT (U/L)                           | 60.7±49.6   |
| ALT/GPT (U/L)                           | 58.8±52.1   |

ALT/GPT: alanine aminotransferase/glutamic-pyruvic transaminase; AST/GOT: aspartate aminotransferase/glutamic-oxalacetic transaminase; Cl<sup>-</sup>: Chloride; FiO<sub>2</sub>: fraction of inspired oxygen; K<sup>+</sup>: potassium; Na<sup>+</sup>: sodium; PaCO<sub>2</sub>: arterial carbon dioxide partial pressure; PaO<sub>2</sub>: arterial oxygen partial pressure; PEEP: positive end-expiratory pressure; SaO<sub>2</sub>: arterial oxygen saturation of haemoglobin.

|                                                           |              |
|-----------------------------------------------------------|--------------|
| Age (years)                                               | 57.4 ± 7.4   |
| Sex                                                       |              |
| Female                                                    | 12 (26.3%)   |
| Male                                                      | 44 (73.7%)   |
| BMI (kg/m <sup>2</sup> )                                  | 27.5 ± 3.2   |
| Time between symptom onset and hospitalization (days)     | 7.8 ± 4.2    |
| Time between hospitalization and prone positioning (days) | 3.4 ± 3.1    |
| Time between symptom onset and prone positioning (days)   | 11.2 ± 4.5   |
| Comorbidities                                             |              |
| Previous myocardial infarction                            | 4 (7.1%)     |
| Congestive heart failure                                  | 0 (0%)       |
| Hypertension                                              | 23 (41.1%)   |
| Vascular disease                                          | 3 (5.4%)     |
| Chronic bronchopulmonary disease                          | 2 (3.6%)     |
| Gastric or liver disease                                  | 3 (5.4%)     |
| Diabetes                                                  | 8 (14.3%)    |
| Moderate-severe Chronic Kidney Disease (eGFR<59)          | 0 (0%)       |
| Solid malignancy                                          | 3 (5.4%)     |
| Smoking history                                           |              |
| Active smoker                                             | 1 (1.8%)     |
| Former smoker (<1 year)                                   | 1 (1.8%)     |
| Former smoker (≥ 1 year)                                  | 20 (35.7.0%) |
| Never smoked                                              | 29 (51.8%)   |
| Not declared                                              | 5 (8.9%)     |
| Baseline blood values                                     |              |
| Na <sup>+</sup> (mmol/L)                                  | 138.4 ± 3.2  |
| K <sup>+</sup> (mmol/L)                                   | 4.1 ± 0.7    |
| Cl <sup>-</sup> (mmol/L)                                  | 101.2 ± 3.5  |
| Creatinine (mg/dL)                                        | 0.9 ± 0.2    |

|                                         |               |
|-----------------------------------------|---------------|
| Urea (mg/dL)                            | 32.6 ± 9.7    |
| White blood cells (10 <sup>3</sup> /μL) | 7.7 ± 3.7     |
| Platelets (10 <sup>3</sup> /μL)         | 279.0 ± 114.1 |
| Haemoglobin (g/dL)                      | 12.7 ± 1.6    |
| Haematocrit (%)                         | 37.3 ± 4.5    |
| Bilirubin (mg/dL)                       | 0.6 ± 0.4     |
| C-reactive protein (mg/L)               | 11.1 ± 7.1    |
| Procalcitonin (ng/mL)                   | 0.7 ± 1.6     |
| Lactate dehydrogenase (U/L)             | 411.0 ± 162.2 |
| AST/GOT (U/L)                           | 57.2 ± 40.9   |
| ALT/GPT (U/L)                           | 61.1 ± 52.0   |
| INR                                     | 1.2 ± 0.4     |
| aPTT ratio                              | 1.0 ± 0.2     |
| D-dimer (ng/mL)                         | 640.9 ± 521.5 |
| Arterial blood gas at SP1               |               |
| pH                                      | 7.46 ± 0.0    |
| PaO <sub>2</sub> (mmHg)                 | 117.1 ± 47.4  |
| PaCO <sub>2</sub> (mmHg)                | 35.3 ± 4.9    |
| SaO <sub>2</sub> (%)                    | 97.2 ± 2.0    |
| Respiratory rate                        | 24.5 ± 5.5    |
| Arterial blood gas at PP1               |               |
| pH                                      | 7.46 ± 0.0    |
| PaO <sub>2</sub> (mmHg)                 | 200.4 ± 110.9 |
| PaCO <sub>2</sub> (mmHg)                | 35.6 ± 4.5    |
| SaO <sub>2</sub> (%)                    | 98.4 ± 1.3    |
| Arterial blood gas at SP2               |               |
| pH                                      | 7.46 ± 0.0    |
| PaO <sub>2</sub> (mmHg)                 | 121.4 ± 69.6  |
| PaCO <sub>2</sub> (mmHg)                | 35.5 ± 4.4    |
| SaO <sub>2</sub> (%)                    | 97.1 ± 2.0    |
| Outcomes                                |               |
| Tracheal intubation                     | 19 (33.9%)    |
| Time to intubation                      | 2.0 [2.0-4.0] |
| Duration of prone positioning           | 3.0 [3.0-4.0] |
| Prone positioning for > 3 hours         | 26 (46.4%)    |

|                                    |            |
|------------------------------------|------------|
| Number of prone positioning cycles | 1 [1-3]    |
| Prone positioning cycles >1        | 21 (49.0%) |

ALT/GPT: alanine aminotransferase/glutamic-pyruvic transaminase; AST/GOT: aspartate aminotransferase/glutamic-oxalacetic transaminase; BMI: body mass index; Cl<sup>-</sup>: Chloride; CPAP: continuous positive airway pressure; FiO<sub>2</sub>: fraction of inspired oxygen; K<sup>+</sup>: potassium Na<sup>+</sup>: sodium; PaCO<sub>2</sub>: arterial carbon dioxide partial pressure; PaO<sub>2</sub>: arterial oxygen partial pressure; PEEP: positive end-expiratory pressure; SaO<sub>2</sub>: arterial oxygen saturation of haemoglobin.

**Table E4 – Comparison between patients in whom prone positioning was feasible and not feasible**

|                                         | Feasible (n = 47) | Non-feasible (n = 9) | p      | Difference | 95% CI |       |
|-----------------------------------------|-------------------|----------------------|--------|------------|--------|-------|
| Age (years)                             | 57.1 ± 7.2        | 58.9 ± 8.4           | 0.52   | 1.8        | -3.7   | 7.2   |
| BMI (kg/m <sup>2</sup> )                | 27.3 ± 3.6        | 28.4 ± 4.6           | 0.44   | 1.1        | -1.8   | 4.0   |
| Baseline blood values                   |                   |                      |        |            |        |       |
| Na <sup>+</sup> (mmol/L)                | 138.3 ± 3.3       | 139.4 ± 2.9          | 0.32   | 1.2        | -1.2   | 3.6   |
| K <sup>+</sup> (mmol/L)                 | 4.0 ± 0.5         | 4.5 ± 1.1            | 0.05   | 0.5        | 0.0    | 1.0   |
| Cl <sup>-</sup> (mmol/L)                | 101.1 ± 3.6       | 101.3 ± 3.2          | 0.88   | 0.2        | -2.4   | 2.8   |
| Creatinine (mg/dL)                      | 0.9 ± 0.2         | 1.0 ± 0.3            | 0.30   | 0.1        | -0.1   | 0.3   |
| Urea (mg/dL)                            | 31.3 ± 9.0        | 38.8 ± 10.7          | 0.03   | 7.4        | 0.6    | 14.3  |
| White blood cells (10 <sup>3</sup> /μL) | 7.6 ± 3.3         | 8.1 ± 5.4            | 0.72   | 0.5        | -2.2   | 3.1   |
| Platelets (10 <sup>3</sup> /μL)         | 282.2 ± 116.7     | 262.3 ± 104.2        | 0.64   | 19.9       | -103.6 | 64.0  |
| Haemoglobin (g/dL)                      | 12.6 ± 1.6        | 13.5 ± 1.2           | 0.14   | 0.9        | -0.3   | 2.0   |
| Haematocrit (%)                         | 37.0 ± 4.7        | 39.3 ± 2.5           | 0.16   | 2.3        | -1.0   | 5.6   |
| Bilirubin (mg/dL)                       | 0.6 ± 0.4         | 0.6 ± 0.4            | 0.73   | 0.0        | -0.2   | 0.3   |
| C-reactive protein (mg/L)               | 11.0 ± 7.4        | 11.2 ± 5.2           | 0.94   | 0.2        | -5.0   | 5.4   |
| Procalcitonin (ng/mL)                   | 0.5 ± 0.8         | 1.8 ± 3.6            | 0.10   | 1.3        | -0.3   | 2.8   |
| Lactate dehydrogenase (U/L)             | 389.7 ± 157.1     | 508.1 ± 157.6        | 0.05   | 118.4      | 2.1    | 234.7 |
| AST/GOT (U/L)                           | 48.6 ± 24.8       | 111.7 ± 75.5         | 0.0002 | 63.1       | 32.2   | 94.1  |
| ALT/GPT (U/L)                           | 53.3 ± 36.7       | 110.0 ± 98.0         | 0.01   | 56.7       | 17.0   | 96.4  |
| INR                                     | 1.2 ± 0.4         | 1.1 ± 0.1            | 0.58   | 0.1        | -0.3   | 0.2   |
| aPTT ratio                              | 1.0 ± 0.1         | 1.0 ± 0.3            | 0.55   | 0.0        | -0.2   | 0.1   |
| D-dimer (ng/mL)                         | 633.5 ± 451.3     | 673.2 ± 793.0        | 0.84   | 56.7       | -352.5 | 432.0 |
| FiO <sub>2</sub> (%)                    | 68.5 ± 19.8       | 74.4 ± 15.9          | 0.40   | 5.9        | -8.1   | 20.0  |
| PEEP (mmHg)                             | 8.2 ± 2.3         | 8.8 ± 1.9            | 0.96   | 0.6        | -1.2   | 2.3   |
| Arterial blood gas                      |                   |                      |        |            |        |       |
| pH                                      | 7.46 ± 0.0        | 7.45 ± 0.0           | 0.35   | 0.0        | 0.0    | 0.0   |

|                                           |              |               |      |      |       |      |
|-------------------------------------------|--------------|---------------|------|------|-------|------|
| PaO <sub>2</sub> (mmHg)                   | 116.0 ± 47.5 | 132.6 ± 66.6  | 0.37 | 16.6 | -20.4 | 53.7 |
| PaO <sub>2</sub> /FiO <sub>2</sub> (mmHg) | 179.5 ± 76.1 | 189.4 ± 104.0 | 0.74 | 10.0 | -49.0 | 68.9 |
| PaCO <sub>2</sub> (mmHg)                  | 35.2 ± 4.8   | 36.6 ± 5.5    | 0.45 | 1.4  | -2.2  | 4.9  |
| SaO <sub>2</sub> (%)                      | 97.1 ± 2.1   | 96.8 ± 2.7    | 0.75 | 0.3  | -1.9  | 1.4  |
| Respiratory rate                          | 24.4 ± 5.5   | 28.4 ± 4.8    | 0.13 | 4.0  | -1.2  | 9.2  |

**Table E5 – Comparison of patients undergoing different prone positioning cycles at five days**

|                                           | PP Cycles = 1 (n=21) | PP Cycles = 2 or 3 (n=15) | PP Cycles ≥ 4 (n=8) |
|-------------------------------------------|----------------------|---------------------------|---------------------|
| PEEP (cmH <sub>2</sub> O)                 | 7.6±2.5              | 7.7±2.5                   | 7.7±2.5             |
| FiO <sub>2s</sub>                         | 50.7±26.6            | 57.7±19.2                 | 50.6±17.9           |
| PaO <sub>2</sub> (mmHg)                   | 128.8±60.6           | 140.02±54.4               | 121.8±43.3          |
| PaO <sub>2</sub> /FiO <sub>2</sub> (mmHg) | 251.4±108.5          | 242.9±47.6                | 258.7±88.5          |
| PaCO <sub>2</sub> (mmHg)                  | 35.4±5.1             | 39.6±3.6                  | 34.3±4.2            |
| pH                                        | 7.5±0.0              | 7.4±0.0                   | 7.5±0.0             |
| Na <sup>+</sup> (mmol/L)                  | 139.9±2.5            | 137.0±1.0                 | 139.0±1.8           |
| K <sup>+</sup> (mmol/L)                   | 4.4±0.5              | 4.2±0.8                   | 4.2±0.7             |
| Cl <sup>-</sup> (mmol/L)                  | 104.0±3.4            | 101.7±2.1                 | 101.7±4.3           |
| Creatinine (mg/dL)                        | 0.8±0.2              | 0.6±0.1                   | 0.9±0.2             |
| Urea (mg/dL)                              | 35.8±8.3             | N/A                       | 28.6±2.6            |
| White blood cells (103/μL)                | 6.7±2.2              | 7.3±2.8                   | 6.7±3.7             |
| Platelets (103/μL)                        | 407.9±148.5          | 402.3±80.4                | 427.1±63.1          |
| Haemoglobin (g/dL)                        | 11.8±1.0             | 10.9±1.2                  | 11.9±1.0            |
| Haematocrit (%)                           | 35.1±2.6             | 32.4±3.9                  | 35.4±3.3            |
| Bilirubin (mg/dL)                         | 0.4±0.1              | 0.3±0.1                   | 0.4±0.1             |
| C-reactive protein (mg/dL)                | 4.87±6.8             | 2.7±3.8                   | 2.5±3.1             |
| Procalcitonin (ng/mL)                     | 0.1±0.1              | 0.22 (single datum)       | 0.15 (single datum) |
| Lactate dehydrogenase (U/L)               | 310.3±117.1          | 296.5±76.4                | 264.7±52.0          |
| AST/GOT (U/L)                             | 48.5±25.8            | 26.7±10.3                 | 36.6±12.6           |
| ALT/GPT (U/L)                             | 80.1±64.4            | 38.3±17.5                 | 64.0±41.0           |
| INR                                       | 1.1±0.1              | 1.1±0.1                   | 1.1±0.1             |
| aPTTr                                     | 1.02±0.1             | 0.9±0.1                   | 0.9±0.1             |
| D-dimer (ng/mL)                           | 907.70±925.6         | 522.7±342.0               | 882.8±853.0         |

ALT/GPT: alanine aminotransferase/glutamic-pyruvic transaminase; AST/GOT: aspartate aminotransferase/glutamic-oxalacetic transaminase; BMI: body mass index; Cl<sup>-</sup>: Chloride; CPAP: continuous positive airway pressure; FiO<sub>2</sub>: fraction of inspired oxygen; GFR: glomerular filtration rate; K<sup>+</sup>: potassium Na<sup>+</sup>: sodium; PaCO<sub>2</sub>: arterial carbon dioxide partial pressure; PaO<sub>2</sub>: arterial oxygen partial pressure; PEEP: positive end-expiratory pressure; SaO<sub>2</sub>: arterial oxygen saturation of haemoglobin; SP1: baseline supine position; PP1: after prone positioning; SP2: one hour after resuming supine position; SpO<sub>2</sub>: peripheral oxygen saturation of haemoglobin.

**Table E6 – Study timepoints in patients with baseline PaO<sub>2</sub>/FiO<sub>2</sub><300 mmHg (N=42)**

|                                           | Supine (SP1) | At prone positioning (PP1) | One hour after supine positioning (SP2) | p (SP1 vs PP1) | Difference (SP1 vs PP1) | 95% CI |       | p (SP1 vs SP2) | Difference (SP1 vs SP2) | 95% CI |       |
|-------------------------------------------|--------------|----------------------------|-----------------------------------------|----------------|-------------------------|--------|-------|----------------|-------------------------|--------|-------|
|                                           |              |                            |                                         |                |                         |        |       |                |                         |        |       |
| FiO <sub>2</sub> (%)                      | 70.0 ± 20.0  | 70.0 ± 20.0                | 66.7 ± 20.6                             | 1.0            | 0.0                     | 0.0    | 0.0   | 0.11           | 3.3                     | -7.4   | 0.8   |
| PEEP (cmH <sub>2</sub> O)                 | 8.4 ± 2.2    | 8.4 ± 2.2                  | 8.4 ± 2.2                               | 1.0            | 0.0                     | 0.0    | 0.0   | 0.33           | 0.1                     | -0.1   | 0.2   |
| Arterial blood gas                        |              |                            |                                         |                |                         |        |       |                |                         |        |       |
| pH                                        | 7.46 ± 0.00  | 7.46 ± 0.00                | 7.46 ± 0.00                             | 0.66           | 0.0                     | 0.0    | 0.0   | 0.13           | 0.0                     | 0.0    | 0.0   |
| PaO <sub>2</sub> (mmHg)                   | 109.1 ± 38.7 | 192.2 ± 109.8              | 112.7 ± 52.8                            | <0.0001        | 83.1                    | -53.5  | 112.6 | 0.67           | 3.6                     | -13.2  | 20.4  |
| PaO <sub>2</sub> /FiO <sub>2</sub> (mmHg) | 164.3 ± 56.7 | 256.8 ± 96.5               | 178.5 ± 83.7                            | <0.0001        | 101.5                   | -69.9  | 133.0 | 0.18           | 14.2                    | -6.6   | 35.0  |
| PaCO <sub>2</sub> (mmHg)                  | 35.5 ± 4.9   | 35.6 ± 4.6                 | 35.5 ± 4.5                              | 0.86           | 0.1                     | -1.1   | 0.9   | 0.98           | 0.0                     | -1.2   | 1.2   |
| SaO <sub>2</sub> (%)                      | 97.0 ± 2.0   | 98.4 ± 1.4                 | 96.9 ± 2.1                              | <0.0001        | -1.3                    | -1.9   | 0.9   | 0.46           | 0.1                     | -1.0   | 0.5   |
| SpO <sub>2</sub> (%)                      | 96.9 ± 2.9   | 98.0 ± 2.2                 | 97.0 ± 1.9                              | 0.01           | -1.1                    | -2.2   | -0.3  | 0.67           | 0.1                     | -0.8   | 1.2   |
| Respiratory rate                          | 24.8 ± 5.7   | 25.0 ± 7.0                 | 24.2 ± 6.6                              | 0.97           | -0.2                    | -1.4   | 1.4   | 0.39           | 0.6                     | -2.2   | 0.9   |
| Use of accessory respiratory muscles      | 9 (21.4%)    | 7 (16.7%)                  | 5 (11.9%)                               | 0.32           | 4.8%                    | -6.8%  | 16.3% | 0.16           | 9.5%                    | -5.7%  | 24.8% |
| Dyspnoea                                  | 7 (16.7%)    | 4 (9.5%)                   | 2 (4.8%)                                | 0.26           | 7.2%                    | -7.3%  | 21.7% | 0.06           | 11.9%                   | -2.2%  | 26.1% |
| Comfort                                   |              |                            |                                         | 0.32           |                         |        |       | 0.10           |                         |        |       |
| Unacceptable                              | 0 (0%)       | 0 (0%)                     | 0 (0%)                                  |                |                         |        |       |                |                         |        |       |
| Acceptable                                | 9 (21.4%)    | 13 (31.0%)                 | 4 (9.5%)                                |                |                         |        |       |                |                         |        |       |
| Good                                      | 22 (52.4%)   | 19 (45.1%)                 | 22 (52.4%)                              |                |                         |        |       |                |                         |        |       |
| Excellent                                 | 11 (26.2%)   | 10 (23.8%)                 | 15 (35.7%)                              |                |                         |        |       |                |                         |        |       |



FiO<sub>2</sub>: fraction of inspired oxygen; PaCO<sub>2</sub>: arterial carbon dioxide partial pressure; PaO<sub>2</sub>: arterial oxygen partial pressure; PEEP: positive end-expiratory pressure;  
SaO<sub>2</sub>: arterial oxygen saturation of haemoglobin; SP1: baseline supine position; PP1: after prone positioning; SP2: one hour after resuming supine position;  
SpO<sub>2</sub>: peripheral oxygen saturation of haemoglobin;

|                                           | Supine (SP1) | At prone positioning (PP1) | One hour after supine positioning (SP2) | p- value SP1 vs PP1 | 95% Confidence intervals | p- value SP1 vs SP2 | 95% CI       |
|-------------------------------------------|--------------|----------------------------|-----------------------------------------|---------------------|--------------------------|---------------------|--------------|
| FiO2                                      | 69.5±19.4    | 69.5±19.4                  | 69.2±19.5                               | 1.0                 | 0.0 0.0                  | 0.10                | -6.08 0.63   |
| PEEP (cmH <sub>2</sub> O)                 | 8.4±2.2      | 8.4±2.2                    | 8.3±2.2                                 | 1.0                 | 0.0 0.0                  | 0.03                | -0.05 0.16   |
| Arterial blood gas                        |              |                            |                                         |                     |                          | 0.76                |              |
| pH                                        | 7.4±0.00     | 7.4±0.0                    | 7.5±0.0                                 | 0.94                | 0.0 0.0                  | 0.08                | -.00 .01     |
| PaO <sub>2</sub> (mmHg)                   | 118.7±50.7   | 202.2±113.7                | 124.0±71.1                              | <0.0001             | -109.9 -58.0             | 0.61                | -12.04 20.44 |
| PaO <sub>2</sub> /FiO <sub>2</sub> (mmHg) | 181.1±80.1   | 287.6±125.5                | 194.4±103.1                             | <0.0001             | -137.20 -77.92           | 0.28                | -9.95 33.43  |
| PaCO <sub>2</sub> (mmHg)                  | 35.5±4.9     | 35.9±4.6                   | 35.9±4.5                                | 0.22                | -1.50 .36                | 0.41                | -.65 1.56    |
| SaO <sub>2</sub> (%)                      | 97.1±2.1     | 98.3±1.6                   | 97.1±2.1                                | <0.0001             | -1.76 -.78               | 0.45                | -.90 .40     |
| SpO <sub>2</sub> (%)                      | 96.9±2.8     | 98.0±2.3                   | 97.1±1.9                                | 0.00                | -1.96 -.40               | 0.92                | -.81 .89     |
| Use of accessory respiratory muscles      | 12(21.4%)    | 9(16.1%)                   | 7(12.5%)                                | 0.18                | -.04 .15                 | 0.10                | -.03 .21     |
| Dyspnoea                                  | 9(16.1%)     | 6(10.71%)                  | 3(5.36%)                                | 0.26                | -.06 .16                 | 0.03                | -.01 .22     |

FiO<sub>2</sub>: fraction of inspired oxygen; PaCO<sub>2</sub>: arterial carbon dioxide partial pressure; PaO<sub>2</sub>: arterial oxygen partial pressure; PEEP: positive end-expiratory pressure; SaO<sub>2</sub>: arterial oxygen saturation of haemoglobin; SP1: baseline supine position; PP1: after prone positioning; SP2: one hour after resuming supine position; SpO<sub>2</sub>: peripheral oxygen saturation of haemoglobin.

**Table E8 – Comparison between responders and non-responders (PaO<sub>2</sub>/FiO<sub>2</sub> improvement >10%)**

|                                                           | Responders (n = 19) | Non-responders (n = 27) | p    | Difference | 95% CI |     |
|-----------------------------------------------------------|---------------------|-------------------------|------|------------|--------|-----|
| Age (years)                                               | 58.2 ± 7.4          | 56.5 ± 7.3              | 0.44 | 1.7        | -6.2   | 2.7 |
| Sex                                                       |                     |                         |      |            |        |     |
| Female                                                    | 5 (26.3%)           | 27 (25.6%)              | 0.98 |            |        |     |
| Male                                                      | 14 (73.7%)          | 20 (74.1%)              |      |            |        |     |
| BMI (kg/m <sup>2</sup> )                                  | 26.5 ± 3.2          | 27.9 ± 3.8              | 0.23 | 1.4        | -0.9   | 3.6 |
| Time between symptom onset and hospitalization (days)     | 8.7 ± 5.0           | 7.0 ± 4.0               | 0.22 | 1.6        | -4.3   | 1.0 |
| Time between hospitalization and prone positioning (days) | 2.5 ± 2.0           | 4.5 ± 3.6               | 0.03 | 2.0        | 0.2    | 3.9 |
| Time between symptom onset and prone positioning (days)   | 11.2 ± 5.1          | 11.6 ± 4.3              | 0.78 | 0.4        | -2.4   | 3.2 |
| Comorbidities                                             |                     |                         |      |            |        |     |
| Previous myocardial infarction                            | 1 (5.3%)            | 1 (3.7%)                |      |            |        |     |
| Congestive heart failure                                  | 0 (0%)              | 0 (0%)                  |      |            |        |     |
| Hypertension                                              | 7 (36.8%)           | 11 (40.7%)              |      |            |        |     |
| Vascular disease                                          | 0 (0%)              | 3 (11.1%)               |      |            |        |     |
| Chronic bronchopulmonary disease                          | 1 (5.3%)            | 0 (0%)                  |      |            |        |     |
| Gastric or liver disease                                  | 0 (0%)              | 2 (7.4%)                |      |            |        |     |
| Diabetes                                                  | 4 (21.1%)           | 2 (7.4%)                |      |            |        |     |
| Moderate-severe Chronic Kidney Disease (eGFR<59)          | 0 (0%)              | 0 (0%)                  |      |            |        |     |
| Solid malignancy                                          | 1 (5.3%)            | 2 (7.4%)                |      |            |        |     |
| Smoking history                                           |                     |                         |      |            |        |     |
| Active smoker                                             | 0 (0%)              | 1 (3.7%)                |      |            |        |     |
| Former smoker (<1 year)                                   | 0 (0%)              | 1 (3.7%)                |      |            |        |     |
| Former smoker (≥ 1 year)                                  | 7 (37.0%)           | 9 (33.3%)               |      |            |        |     |
| Never smoked                                              | 10 (52.6%)          | 15 (55.9%)              |      |            |        |     |
| Not declared                                              | 2 (10.5%)           | 1 (3.7%)                |      |            |        |     |
| Baseline blood values                                     |                     |                         |      |            |        |     |
| Na <sup>+</sup> (mmol/L)                                  | 137.9 ± 2.3         | 138.4 ± 3.9             | 0.62 | 0.5        | -1.5   | 2.5 |
| K <sup>+</sup> (mmol/L)                                   | 3.9 ± 0.5           | 4.1 ± 0.6               | 0.23 | 0.2        | -0.1   | 0.5 |
| Cl <sup>-</sup> (mmol/L)                                  | 101.8 ± 3.5         | 100.5 ± 3.5             | 0.21 | 1.4        | -3.5   | 0.8 |
| Creatinine (mg/dL)                                        | 0.9 ± 0.2           | 0.8 ± 0.2               | 0.45 | 0.0        | -0.2   | 0.1 |

|                                         |               |               |         |       |        |       |
|-----------------------------------------|---------------|---------------|---------|-------|--------|-------|
| Urea (mg/dL)                            | 30.5 ± 7.4    | 30.8 ± 8.6    | 0.93    | 0.2   | -5.0   | 5.4   |
| White blood cells (10 <sup>3</sup> /μL) | 7.6 ± 2.8     | 7.4 ± 3.6     | 0.80    | 0.3   | -2.2   | 1.7   |
| Platelets (10 <sup>3</sup> /μL)         | 251.7 ± 105.5 | 300.7 ± 122.9 | 0.17    | 48.9  | -21.1  | 119.0 |
| Haemoglobin (g/dL)                      | 12.9 ± 2.1    | 12.4 ± 1.2    | 0.30    | 0.5   | -1.5   | 0.5   |
| Haematocrit (%)                         | 37.7 ± 5.9    | 36.4 ± 3.8    | 0.36    | 1.3   | -4.2   | 1.6   |
| Bilirubin (mg/dL)                       | 0.7 ± 0.5     | 0.5 ± 0.2     | 0.14    | 0.2   | -0.4   | 0.1   |
| C-reactive protein (mg/L)               | 12.7 ± 7.0    | 9.1 ± 6.5     | 0.08    | 3.7   | -7.7   | 0.4   |
| Procalcitonin (ng/mL)                   | 0.3 ± 0.3     | 0.7 ± 1.1     | 0.31    | 0.34  | -0.3   | 1.0   |
| Lactate dehydrogenase (U/L)             | 457.6 ± 209.2 | 350.8 ± 111.4 | 0.04    | 106.8 | -208.9 | -4.8  |
| AST/GOT (U/L)                           | 52.5 ± 28.2   | 46.4 ± 23.0   | 0.47    | 6.1   | -23.2  | 11.0  |
| ALT/GPT (U/L)                           | 52.1 ± 40.3   | 54.9 ± 35.5   | 0.81    | 2.8   | -20.8  | 26.4  |
| INR                                     | 1.3 ± 0.6     | 1.1 ± 0.1     | 0.18    | 0.2   | -0.4   | 0.1   |
| aPTT ratio                              | 1.1 ± 0.1     | 1.0 ± 0.1     | 0.37    | 0.4   | -0.1   | 0.0   |
| D-dimer (ng/mL)                         | 614.1 ± 472.3 | 604.2 ± 411.8 | 0.95    | 9.8   | -310.0 | 290.4 |
| Arterial blood gas at SP1               |               |               |         |       |        |       |
| pH                                      | 7.45 ± 0.0    | 7.46 ± 0.0    | 0.76    | 0.0   | 0.0    | 0.0   |
| PaO <sub>2</sub> (mmHg)                 | 120.5 ± 51.7  | 114.7 ± 45.0  | 0.70    | 5.8   | -34.6  | 23.1  |
| PaCO <sub>2</sub> (mmHg)                | 34.3 ± 4.9    | 36.0 ± 4.8    | 0.24    | 1.7   | -1.2   | 4.6   |
| SaO <sub>2</sub> (%)                    | 97.3 ± 2.1    | 97.1 ± 2.0    | 0.84    | 0.12  | -1.3   | 1.1   |
| Arterial blood gas at PP1               |               |               |         |       |        |       |
| pH                                      | 7.46 ± 0.0    | 7.46 ± 0.0    | 0.99    | 0.0   | 0.0    | 0.0   |
| PaO <sub>2</sub> (mmHg)                 | 230.0 ± 110.1 | 179.6 ± 108.8 | 0.13    | 50.4  | -116.4 | 15.6  |
| PaCO <sub>2</sub> (mmHg)                | 34.3 ± 5.2    | 36.5 ± 3.8    | 0.10    | 2.2   | -0.5   | 4.9   |
| SaO <sub>2</sub> (%)                    | 98.6 ± 1.3    | 98.3 ± 1.4    | 0.58    | 0.23  | -1.1   | 0.6   |
| Arterial blood gas at SP2               |               |               |         |       |        |       |
| pH                                      | 7.46 ± 0.0    | 7.47 ± 0.0    | 0.57    | 0.0   | 0.0    | 0.0   |
| PaO <sub>2</sub> (mmHg)                 | 167.4 ± 87.5  | 88.9 ± 21.0   | <0.0001 | 78.5  | -113.6 | -43.3 |
| PaCO <sub>2</sub> (mmHg)                | 34.4 ± 4.6    | 36.3 ± 4.2    | 0.16    | 1.9   | -0.7   | 4.5   |
| SaO <sub>2</sub> (%)                    | 98.1 ± 2.1    | 96.5 ± 1.8    | 0.01    | 1.6   | -2.8   | -0.4  |
| Outcomes                                |               |               |         |       |        |       |
| Tracheal intubation                     | 4 (21.1%)     | 9 (33.3%)     | 0.36    |       | -0.1   | 0.4   |
| Time to intubation                      | 2 [2-4]       | 2 [1-5]       | 1.0     |       |        |       |
| Duration of prone positioning           | 3.5 [3-4]     | 3.5 [3-4]     | 0.85    |       |        |       |
| Prone positioning for > 3 hours         | 10 (52.6%)    | 15 (55.6%)    | 0.85    | 3.0%  | -26.6% | 32.2% |

|                                    |            |            |      |      |        |       |
|------------------------------------|------------|------------|------|------|--------|-------|
| Number of prone positioning cycles | 4 [3-4]    | 2 [1-4]    | 0.72 |      |        |       |
| Prone positioning cycles >1        | 10 (52.6%) | 13 (48.1%) | 0.72 | 4.5% | -35.5% | 24.4% |

ALT/GPT: alanine aminotransferase/glutamic-pyruvic transaminase; AST/GOT: aspartate aminotransferase/glutamic-oxalacetic transaminase; BMI: body mass index; Cl<sup>-</sup>: Chloride; CPAP: continuous positive airway pressure; FiO<sub>2</sub>: fraction of inspired oxygen; GFR: glomerular filtration rate; K<sup>+</sup>: potassium Na<sup>+</sup>: sodium; PaCO<sub>2</sub>: arterial carbon dioxide partial pressure; PaO<sub>2</sub>: arterial oxygen partial pressure; PEEP: positive end-expiratory pressure; SaO<sub>2</sub>: arterial oxygen saturation of haemoglobin; SP1: baseline supine position; PP1: after prone positioning; SP2: one hour after resuming supine position; SpO<sub>2</sub>: peripheral oxygen saturation of haemoglobin.

**Table E9 – Comparison between responders and non-responders (PaO<sub>2</sub>/FiO<sub>2</sub> improvement >20%)**

|                                                           | <b>Responders<br/>(n = 15)</b> | <b>Non-responders<br/>(n = 31)</b> | <b>p</b> | <b>Difference</b> | <b>95% CI</b> |     |
|-----------------------------------------------------------|--------------------------------|------------------------------------|----------|-------------------|---------------|-----|
| Age (years)                                               | 58.6 ± 7.4                     | 56.5 ± 7.3                         | 0.37     | 2.1               | -6.7          | 2.6 |
| Sex                                                       |                                |                                    |          |                   |               |     |
| Female                                                    | 5 (33.3%)                      | 7 (22.6%)                          | 0.44     |                   |               |     |
| Male                                                      | 10 (66.7%)                     | 24 (77.4%)                         |          |                   |               |     |
| BMI (kg/m <sup>2</sup> )                                  | 27.1 ± 3.4                     | 27.5 ± 3.7                         | 0.71     | 0.5               | -1.9          | 2.9 |
| Time between symptom onset and hospitalization (days)     | 8.4 ± 5.6                      | 7.4 ± 3.9                          | 0.48     | 1.0               | -3.9          | 1.8 |
| Time between hospitalization and prone positioning (days) | 2.7 ± 2.1                      | 4.1 ± 3.5                          | 0.16     | 1.4               | -0.6          | 3.4 |
| Time between symptom onset and prone positioning (days)   | 11.1 ± 5.7                     | 11.5 ± 4.1                         | 0.79     | 0.4               | -2.5          | 3.3 |
| Comorbidities                                             |                                |                                    |          |                   |               |     |
| Previous myocardial infarction                            | 1 (6.7%)                       | 1 (3.2%)                           |          |                   |               |     |
| Congestive heart failure                                  | 0 (0%)                         | 0 (0%)                             |          |                   |               |     |
| Hypertension                                              | 6 (40.0%)                      | 12 (38.7%)                         |          |                   |               |     |
| Vascular disease                                          | 0 (0%)                         | 3 (9.7%)                           |          |                   |               |     |
| Chronic bronchopulmonary disease                          | 1 (6.7%)                       | 0 (0%)                             |          |                   |               |     |
| Gastric or liver disease                                  | 0 (0%)                         | 2 (6.5%)                           |          |                   |               |     |
| Diabetes                                                  | 4 (26.7%)                      | 2 (6.5%)                           |          |                   |               |     |
| Moderate-severe Chronic Kidney Disease (eGFR<59)          | 0 (0%)                         | 0 (0%)                             |          |                   |               |     |
| Solid malignancy                                          | 1 (6.7%)                       | 2 (6.5%)                           |          |                   |               |     |
| Smoking history                                           |                                |                                    |          |                   |               |     |
| Active smoker                                             | 0 (0%)                         | 1 (3.2%)                           |          |                   |               |     |
| Former smoker (<1 year)                                   | 0 (0%)                         | 1 (3.2%)                           |          |                   |               |     |
| Former smoker (≥ 1 year)                                  | 6 (40.0%)                      | 10 (32.3%)                         |          |                   |               |     |
| Never smoked                                              | 8 (53.3%)                      | 17 (54.8%)                         |          |                   |               |     |
| Not declared                                              | 1 (6.7%)                       | 2 (6.5%)                           |          |                   |               |     |
| Baseline blood values                                     |                                |                                    |          |                   |               |     |
| Na <sup>+</sup> (mmol/L)                                  | 138.1 ± 2.3                    | 138.3 ± 3.8                        | 0.88     | 0.2               | -2.0          | 2.3 |
| K <sup>+</sup> (mmol/L)                                   | 3.9 ± 0.5                      | 4.0 ± 0.6                          | 0.66     | 0.1               | -0.3          | 0.4 |
| Cl <sup>-</sup> (mmol/L)                                  | 101.8 ± 3.8                    | 100.57 ± 3.4                       | 0.33     | 1.1               | -3.4          | 1.2 |
| Creatinine (mg/dL)                                        | 0.9 ± 0.2                      | 0.9 ± 0.2                          | 0.58     | 0.0               | -0.2          | 0.1 |

|                                         |               |               |         |       |        |       |
|-----------------------------------------|---------------|---------------|---------|-------|--------|-------|
| Urea (mg/dL)                            | 32.1 ± 7.8    | 30.0 ± 8.1    | 0.45    | 2.1   | -7.5   | 3.4   |
| White blood cells (10 <sup>3</sup> /μL) | 7.2 ± 2.6     | 7.6 ± 3.6     | 0.72    | 0.4   | -1.7   | 2.5   |
| Platelets (10 <sup>3</sup> /μL)         | 257.3 ± 118.6 | 291.6 ± 117.0 | 0.36    | 34.3  | -40.2  | 108.8 |
| Haemoglobin (g/dL)                      | 12.5 ± 2.0    | 12.6 ± 1.5    | 0.75    | 0.2   | -0.9   | 1.2   |
| Haematocrit (%)                         | 36.6 ± 5.5    | 37.1 ± 4.5    | 0.74    | 0.5   | -2.6   | 3.6   |
| Bilirubin (mg/dL)                       | 0.7 ± 0.6     | 0.5 ± 0.2     | 0.06    | 0.2   | -0.5   | 0.0   |
| C-reactive protein (mg/L)               | 12.3 ± 6.2    | 9.8 ± 7.1     | 0.25    | 2.5   | -6.9   | 1.9   |
| Procalcitonin (ng/mL)                   | 0.4 ± 0.4     | 0.6 ± 1.0     | 0.49    | 0.2   | -0.5   | 1.0   |
| Lactate dehydrogenase (U/L)             | 469.9 ± 230.3 | 357.2 ± 112.0 | 0.04    | 112.7 | -221.9 | -3.5  |
| AST/GOT (U/L)                           | 52.7 ± 29.1   | 46.8 ± 22.9   | 0.50    | 5.9   | -23.6  | 11.7  |
| ALT/GPT (U/L)                           | 51.0 ± 40.5   | 55.2 ± 35.9   | 0.73    | 4.2   | -20.4  | 28.8  |
| INR                                     | 1.4 ± 0.7     | 1.1 ± 0.1     | 0.09    | 0.2   | -0.5   | 0.0   |
| aPTT ratio                              | 1.1 ± 0.2     | 1.0 ± 0.1     | 0.29    | 0.0   | -0.1   | 0.0   |
| D-dimer (ng/mL)                         | 690.4 ± 511.8 | 578.0 ± 398.9 | 0.48    | 112.4 | -433.6 | 208.9 |
| Arterial blood gas at SP1               |               |               |         |       |        |       |
| pH                                      | 7.45 ± 0.0    | 7.46 ± 0.0    | 0.45    | 0.0   | 0.0    | 0.0   |
| PaO <sub>2</sub> (mmHg)                 | 123.3 ± 50.3  | 114.2 ± 46.5  | 0.55    | 9.1   | -39.4  | 21.2  |
| PaCO <sub>2</sub> (mmHg)                | 34.5 ± 5.2    | 35.6 ± 4.7    | 0.46    | 1.1   | -1.9   | 4.2   |
| SaO <sub>2</sub> (%)                    | 97.6 ± 1.8    | 97.0 ± 2.1    | 0.40    | 0.5   | -1.8   | 0.7   |
| Arterial blood gas at PP1               |               |               |         |       |        |       |
| pH                                      | 7.46 ± 0.0    | 7.46 ± 0.0    | 0.83    | 0.0   | 0.0    | 0.0   |
| PaO <sub>2</sub> (mmHg)                 | 237.4 ± 110.3 | 182.5 ± 108.5 | 0.12    | 54.9  | -124.0 | 14.3  |
| PaCO <sub>2</sub> (mmHg)                | 34.7 ± 5.1    | 36.1 ± 4.3    | 0.32    | 1.4   | -1.5   | 4.3   |
| SaO <sub>2</sub> (%)                    | 98.8 ± 0.9    | 98.2 ± 1.5    | 0.15    | 0.6   | -1.5   | 0.2   |
| Arterial blood gas at SP2               |               |               |         |       |        |       |
| pH                                      | 7.46 ± 0.0    | 7.46 ± 0.0    | 0.65    | 0.0   | 0.0    | 0.0   |
| PaO <sub>2</sub> (mmHg)                 | 182.3 ± 85.9  | 91.9 ± 32.7   | <0.0001 | 90.4  | -125.6 | -55.3 |
| PaCO <sub>2</sub> (mmHg)                | 34.6 ± 4.7    | 36.0 ± 4.3    | 0.34    | 1.3   | -1.4   | 4.1   |
| SaO <sub>2</sub> (%)                    | 98.5 ± 1.5    | 96.4 ± 1.9    | 0.00    | 2.1   | -3.3   | -0.9  |
| Outcomes                                |               |               |         |       |        |       |
| Tracheal intubation                     | 3 (20.0%)     | 10 (32.3%)    | 0.39    |       | -0.1   | 0.4   |
| Time to intubation                      | 2 [2-4]       | 2 [2-4]       | 0.99    |       |        |       |
| Duration of prone positioning           | 3.5 [3-4]     | 3.5 [3-4]     | 0.85    |       |        |       |
| Prone positioning for > 3 hours         | 8 (53.4%)     | 17 (54.9%)    | 0.92    | 1.5%  | -29.2% | 32.2% |

|                                    |           |            |      |       |        |       |
|------------------------------------|-----------|------------|------|-------|--------|-------|
| Number of prone positioning cycles | 2 [1-3]   | 2 [1-4]    | 0.72 |       |        |       |
| Prone positioning cycles >1        | 9 (60.0%) | 14 (45.1%) | 0.46 | 14.9% | -43.5% | 19.0% |

ALT/GPT: alanine aminotransferase/glutamic-pyruvic transaminase; AST/GOT: aspartate aminotransferase/glutamic-oxalacetic transaminase; BMI: body mass index; Cl: Chloride; CPAP: continuous positive airway pressure; FiO<sub>2</sub>: fraction of inspired oxygen; GFR: glomerular filtration rate; K<sup>+</sup>: potassium Na<sup>+</sup>: sodium; PaCO<sub>2</sub>: arterial carbon dioxide partial pressure; PaO<sub>2</sub>: arterial oxygen partial pressure; PEEP: positive end-expiratory pressure; SaO<sub>2</sub>: arterial oxygen saturation of haemoglobin; SP1: baseline supine position; PP1: after prone positioning; SP2: one hour after resuming supine position; SpO<sub>2</sub>: peripheral oxygen saturation of haemoglobin.



| <b>Table E10 - Comparison between responders and non-responders (including patients who failed PP)</b> |                          |                              |          |                |
|--------------------------------------------------------------------------------------------------------|--------------------------|------------------------------|----------|----------------|
|                                                                                                        | <b>Responders (n=25)</b> | <b>Non-responders (n=31)</b> | <b>p</b> | <b>95% CI</b>  |
| Sex                                                                                                    |                          |                              |          |                |
| Female                                                                                                 | 6 (24%)                  | 6 (19.3%)                    |          |                |
| Male                                                                                                   | 19 (76%)                 | 25 (80.7%)                   | 0.67     |                |
| Age (years)                                                                                            | 58.8±8.2                 | 56.3±6.6                     | 0.21     | -6.47 1.45     |
| BMI (kg/m <sup>2</sup> )                                                                               | 27.3±3.4                 | 27.6±4                       | 0.73     | -1.74 2.46     |
| Baseline blood values                                                                                  |                          |                              |          |                |
| Na <sup>+</sup> (mmol/L)                                                                               | 138.0±2.8                | 138.8±3.6                    | 0.40     | -1.02 2.49     |
| K <sup>+</sup> (mmol/L)                                                                                | 4.0±0.7                  | 4.1±0.7                      | 0.55     | -.26 .48       |
| Cl <sup>-</sup> (mmol/L)                                                                               | 102.1±3.3                | 100.4±3.5                    | 0.08     | -3.52 .22      |
| Creatinine (mg/dL)                                                                                     | 0.9±0.2                  | 0.9±0.2                      | 0.51     | -.17 .085      |
| Urea (mg/dL)                                                                                           | 32.4±9.2                 | 32.9±10.2                    | 0.87     |                |
| White blood cells (103/μL)                                                                             | 8.22±4.4                 | 7.3±3.0                      | 0.33     | -2.95 1.02     |
| Platelets (103/μL)                                                                                     | 250.3±103                | 302.1±118.9                  | 0.09     | -8.63 112.24   |
| Haemoglobin (g/dL)                                                                                     | 12.8±1.9                 | 12.7±1.3                     | 0.74     | -1.00 .71      |
| Haematocrit (%)                                                                                        | 37.6±5.3                 | 37.2±3.9                     | 0.75     | -2.85 2.06     |
| Bilirubin (mg/dL)                                                                                      | 0.6±0.4                  | 0.6±0.3                      | 0.65     | -.25 .16       |
| C-reactive protein (mg/L)                                                                              | 12.9±6.6                 | 9.6±7.2                      | 0.09     | -7.04 .50      |
| Procalcitonin (ng/mL)                                                                                  | 0.6±1.0                  | 0.83±2                       | 0.69     | -.92 1.38      |
| Lactate dehydrogenase (U/L)                                                                            | 459.8±190.9              | 378.5±133.6                  | 0.08     | -173.48 10.78  |
| AST/GOT (U/L)                                                                                          | 49.4±25.8                | 63.0±49.1                    | 0.28     | -11.34 38.76   |
| ALT/GPT (U/L)                                                                                          | 48.6±36.8                | 69.8±59.4                    | 0.15     | -8.17 50.60    |
| INR                                                                                                    | 1.3±0.5                  | 1.1±0.1                      | 0.15     | -.35 .056      |
| aPTT ratio                                                                                             | 1.1±0.1                  | 1±0.2                        | 0.13     | -.16 .02       |
| D-dimero (ng/mL)                                                                                       | 673.8±646.7              | 619.4±431.8                  | 0.73     | -367.23 258.30 |
| Comorbidities                                                                                          |                          |                              |          |                |
| Previous myocardial infarction                                                                         | 1(4%)                    | 3(10%)                       |          |                |
| Congestive heart failure                                                                               | 0 (0%)                   | 0 (0%)                       |          |                |
| Hypertension                                                                                           | 10(40%)                  | 13(42%)                      |          |                |
| Vascular disease                                                                                       | 0 (0%)                   | 3(10%)                       |          |                |
| Chronic bronchopulmonary disease                                                                       | 1(4%)                    | 1(3%)                        |          |                |
| Gastric or liver disease                                                                               | 2(8%)                    | 1(3%)                        |          |                |
| Diabetes                                                                                               | 4(16%)                   | 4(13%)                       |          |                |
| Moderate-severe Chronic Kidney Disease (eGFR<59)                                                       | 0 (0%)                   | 0 (0%)                       |          |                |
| Solid malignancy                                                                                       | 1(4%)                    | 2(6%)                        |          |                |
| Smoking history                                                                                        |                          |                              | 0.57     |                |
| Active smoker                                                                                          | 9(36%)                   | 1(3%)                        |          |                |
| Former smoker (<1 year)                                                                                | 14(56%)                  | 1(3%)                        |          |                |
| Former smoker (≥ 1 year)                                                                               | 2(8%)                    | 11(35%)                      |          |                |
| Never smoked                                                                                           |                          | 15(48%)                      |          |                |

|                                                       |             |             |      |               |
|-------------------------------------------------------|-------------|-------------|------|---------------|
| Not declared                                          |             | 3(10%)      |      |               |
| Time between symptom onset and hospitalization (days) | 8.0±4.6     | 7.6±3.9     | 0.76 | -2.63 1.94    |
| Time between enrollment and hospitalization (days)    | 2.7±2.0     | 4.0±3.6     | 0.11 | -.33 2.95     |
| Time between enrollment and symptom onset (days)      | 10.7±4.7    | 11.6±4.3    | 0.42 | -1.44 3.37    |
| Arterial blood gas at SP1                             |             |             |      |               |
| pH                                                    | 7.4±0.0     | 7.4±0.0     | 0.92 | -.016 .017    |
| PaO2 (mmHg)                                           | 114.8±49.7  | 121.8±52.1  | 0.61 | -20.48 34.54  |
| PaCO2 (mmHg)                                          | 35.2±5      | 35.7±4.9    | 0.72 | -2.19 3.14    |
| SaO2 (%)                                              | 97.0±2.3    | 97.1±2.0    | 0.80 | -1.03 1.32    |
| Arterial blood gas at PP1                             |             |             |      |               |
| pH                                                    | 7.4±0.0     | 7.5±0.0     | 0.70 | -.02 .02      |
| PaO2 (mmHg)                                           | 215.4±113.7 | 190.0±114.4 | 0.43 | -88.98 38.23  |
| PaCO2 (mmHg)                                          | 35.2±5.3    | 36.5±3.8    | 0.34 | -1.33 3.76    |
| SaO2 (%)                                              | 98.2±1.9    | 98.4±1.3    | 0.78 | -.78 1.04     |
| Arterial blood gas at SP2                             |             |             |      |               |
| pH                                                    | 7.5±0.0     | 7.5±0.0     | 0.50 | -.01 .02      |
| PaO2 (mmHg)                                           | 153.7±84.7  | 94.2±36.2   | 0.00 | -96.59 -22.52 |
| PaCO2 (mmHg)                                          | 35.4±4.8    | 36.3±4.4    | 0.50 | -1.72 3.48    |
| SaO2 (%)                                              | 97.7±2.2    | 96.5±1.9    | 0.06 | -2.39 .06     |
| Outcomes                                              |             |             |      |               |
| Tracheal intubation                                   | 7(28%)      | 12(39%)     | 0.40 | -.14 .35      |
| Time to intubation                                    | 2 [2-2]     | 3 [1-4]     |      |               |
| Number of prone positioning cycles                    | 1.5 [1-3]   | 1 [1-3]     |      |               |
| Duration of prone positioning                         | 3 [3-4]     | 3 [3-4]     |      |               |

ALT/GPT: alanine aminotransferase/glutamic-pyruvic transaminase; AST/GOT: aspartate aminotransferase/glutamic-oxalacetic transaminase; BMI: body mass index; Cl<sup>-</sup>: Chloride; CPAP: continuous positive airway pressure; FiO<sub>2</sub>: fraction of inspired oxygen; GFR: glomerular filtration rate; K<sup>+</sup>: potassium Na<sup>+</sup>: sodium; PaCO<sub>2</sub>: arterial carbon dioxide partial pressure; PaO<sub>2</sub>: arterial oxygen partial pressure; PEEP: positive end-expiratory pressure; SaO<sub>2</sub>: arterial oxygen saturation of haemoglobin; SP1: baseline supine position; PP1: after prone positioning; SP2: one hour after resuming supine position; SpO<sub>2</sub>: peripheral oxygen saturation of haemoglobin.

| <b>Table E11 – Trajectory of PaO2/FiO2 from SP1 to SP2 through a mixed model</b>             |                    |                       |                                 |       |          |
|----------------------------------------------------------------------------------------------|--------------------|-----------------------|---------------------------------|-------|----------|
|                                                                                              | <b>Coefficient</b> | <b>Standard Error</b> | <b>95% Confidence intervals</b> |       | <b>P</b> |
| SP1 (intercept)                                                                              | 180.5              | 11.1                  | 158.1                           | 202.3 | <0.0001  |
| SP2                                                                                          | 12.3               | 11.0                  | -9.3                            | 34.0  | 0.26     |
| Platelets (for each SD) effect at SP1                                                        | -6.4               | 11.2                  | -28.3                           | 15.6  | 0.57     |
| Additional effect of platelets (for each SD) at SP2                                          | -19.3              | 11.1                  | -41.1                           | 2.4   | 0.08     |
|                                                                                              |                    |                       |                                 |       |          |
| SP1 (intercept)                                                                              | 181.7              | 10.6                  | 160.9                           | 202.6 | <0.0001  |
| SP2                                                                                          | 13.1               | 11.0                  | -8.4                            | 34.6  | 0.23     |
| C-reactive protein (for each SD) effect at SP1                                               | -26.9              | 10.7                  | -47.8                           | -5.9  | 0.01     |
| Additional effect of C-reactive protein (for each SD) at SP2                                 | 26.0               | 11.0                  | 4.4                             | 47.6  | 0.02     |
|                                                                                              |                    |                       |                                 |       |          |
| SP1 (intercept)                                                                              | 176.1              | 11.1                  | 153.1                           | 199.1 | <0.0001  |
| SP2                                                                                          | 4.1                | 10.3                  | -16.0                           | 24.3  | 0.69     |
| Lactate dehydrogenase (for each SD) effect at SP1                                            | -7.1               | 11.8                  | -30.3                           | 16.0  | 0.55     |
| Additional effect of lactate dehydrogenase (for each SD) at SP2                              | 36.3               | 10.3                  | 16.0                            | 56.5  | 0.00     |
|                                                                                              |                    |                       |                                 |       |          |
| SP1 (intercept)                                                                              | 180.5              | 11.0                  | 158.9                           | 202.1 | <0.0001  |
| SP2                                                                                          | 12.3               | 11.1                  | -9.4                            | 34.1  | 0.27     |
| Time between hospitalization and prone positioning (for each SD) effect at SP1               | -12.6              | 11.1                  | -34.3                           | 9.1   | 0.25     |
| Additional effect of time between hospitalization and prone positioning (for each SD) at SP2 | -17.1              | 11.2                  | -39.0                           | 4.8   | 0.13     |
|                                                                                              |                    |                       |                                 |       |          |
| SP1 (intercept)                                                                              | 179.5              | 11.5                  | 157.0                           | 202.0 | <0.0001  |
| SP2                                                                                          | 3.1                | 10.1                  | -16.8                           | 22.9  | 0.76     |
| Lactate dehydrogenase (for each SD) effect at SP1                                            | 3.1                | 12.5                  | -21.3                           | 27.6  | 0.80     |
| Additional effect of lactate dehydrogenase (for each SD) at SP2                              | 27.9               | 11.0                  | 6.3                             | 49.4  | 0.01     |
| C-reactive protein (for each SD) effect at SP1                                               | -24.5              | 12.4                  | -48.8                           | -0.2  | 0.05     |
| Additional effect of C-reactive protein (for each SD) at SP2                                 | 20.3               | 11.0                  | -1.1                            | 41.8  | 0.06     |

Coefficients are expressed in mmHg SD. Standard Deviation SP1: Baseline supine position; SP2: one hour after resuming supine position
